# Supplementary material for: Extensive expansion of primary human gamma delta T cells generates cytotoxic effector memory cells that can be labeled with Feraheme for cellular MRI
Source: Springer Nature journal article supplement (doi:10.1007/s00262-012-1353-y), 2012-10-25
Supplement: MOESM6 [file 262_2012_1353_MOESM6_ESM.doc]

| Donor | Protocol | Culture day | -fold exp  all cells | -fold exp  GDTc |
| --- | --- | --- | --- | --- |
| 3c | mixed | 21 | 277 | 1573 |
|  | M+0 | 20 | 8 | 8 |
| 4d | mixed | 21 | 2732 | 18485 |
|  | M+0 | 21 | 336 | 333 |
| 5b | mixed | 13 | 55 | 70 |
|  | M+0 | 21 | 20 | 21 |
